# Supplementary material for: Lipoicmethylenedioxyphenol Reduces Experimental Atherosclerosis through Activation of Nrf2 Signaling
Source: PubMed Central journal article supplement (PMC4747573; doi:10.1371/journal.pone.0148305), 2016-02-09
Supplement: pone.0148305.s001.pdf [file pone.0148305.s001.pdf]

**10<sup>th</sup> December 2015**

**TO WHOM SO EVER IT MAY CONCERN**

I hereby wish to state that the chemical compound, LA-MDP, mentioned in the manuscript titled “Lipoicmethylenedioxyphenol Reduces Experimental Atherosclerosis through Activation of Nrf2 Signaling” was synthesized by me when I was working for InVasc Therapeutics, Columbus, Ohio, 43210. If you have any question or concern regarding this, please do not hesitate to contact me either through email or contact phone number.

Thank you,

Sincerely yours,

Dr. Rajagopal, Desikan, Ph.D.  
Professor,  
Dept. of Chemistry and Pharmaceutical chemistry  
School of Advanced Science  
VIT University  
Vellore, 632014. Tamil Nadu, India  
Phone : 9578935164  
Email : rajagopal.desikan@vit.ac.in
